# Supplementary material for: Preoperative optimization for vascular involvement complicating revision total hip arthroplasty
Source: PubMed Central journal article supplement — Arthroplast Today. 2018 Mar 21;4(4):411–6. doi: 10.1016/j.artd.2018.02.003 (PMC6287237; doi:10.1016/j.artd.2018.02.003), 2018-03-21
Supplement: mmc6.pdf [file mmc6.pdf]

# CONFLICT OF INTEREST STATEMENT

## *American Association of Hip and Knee Surgeons*

(Adopted from the American Academy of Orthopaedic Surgeons disclosure statement)

The following form **must be filled out completely and submitted by each author (example, 6 authors, 6 forms).** All items require a response. If there is no relevant disclosure for a given item, enter "None."

### Vascular Involvement Complicating Revision Total Hip Arthroplasty—A Case Report

Manuscript Title

1. Royalties from a company or supplier (The following conflicts were disclosed)  
NONE
2. Speakers bureau/paid presentations for a company or supplier (The following conflicts were disclosed)  
NONE
- 3A. Paid employee for a company or supplier (The following conflicts were disclosed)  
NONE
- 3B. Paid consultant for a company or supplier (The following conflicts were disclosed)  
NONE
- 3C. Unpaid consultants for a company or supplier (The following conflicts were disclosed)  
NONE
4. Stock or stock options in a company or supplier (The following conflicts were disclosed)  
NONE
5. Research support from a company or supplier as a Principal Investigator (The following conflicts were disclosed)  
NONE
6. Other financial or material support from a company or supplier (The following conflicts were disclosed)  
NONE
7. Royalties, financial or material support from publishers (The following conflicts were disclosed)  
NONE
8. Medical/Orthopaedic publications editorial/governing board (The following conflicts were disclosed)  
NONE
9. Board member/committee appointments for a society (The following conflicts were disclosed)  
NONE

**Each author must sign AND print or type his/her name, date and submit a separate form**

In addition, one BLINDED Conflict of Interest form (no author names used) should be submitted per manuscript with all author disclosures.

Brandon Passano

Author Name (Print or Type)



Author Signature

12/4/17

Date
